# Supplementary material
Source: publisher figshare collection journal article supplement (https://karger.figshare.com/ndownloader/files/15449555)
Supplement: Supplementary file 1 [file 15449555]

**Supplementary Table 2**. Compliance with exercise program and exercise intensity.

|  | Week 1 | Week 2 | Week 3 | Week 4 | Week 5 | Week 6 | Average |
| --- | --- | --- | --- | --- | --- | --- | --- |
| ***HULA***  Mins/day | 7.6 ± 0.5 | 9.9 ± 0.5 | 12.3 ± 0.7 | 14.2 ± 0.7 | 15.6 ± 0.6 | 17.3 ± 0.7 | 12.8 ± 0.5 |
| Steps/day | 8710 ± 404 | 8855 ± 364 | 8955 ± 409 | 8865 ± 438 | 9367 ± 399 | 9328 ± 436 | 8974 ± 359 |
| ***WALK*** |  |  |  |  |  |  |  |
| Steps/day | 9687 ± 404** | 9791 ± 390* | 9783 ± 462 | 10291 ± 429** | 10604 ± 422** | 10377 ± 454* | 9986 ± 376*** |

All data are presented as mean ± SEM. *p<0.05 for comparison steps/day between the groups, **p<0.01, ***p<0.001 for comparison of steps during HULA as compared to WALK periods.
